# Supplementary material for: Anion-exchange reactions: facile and general access to sensitive photoelectrochemical platforms for biomarker immunosensing
Source: Royal Society of Chemistry journal article supplement (doi:10.1039/c7tb00998d), 2017-01-01
Supplement: c7tb00998d1.pdf [file c7tb00998d1.pdf]

# Supporting Information

## Anion-Exchange Reaction: Facile and General Access to Sensitive Photoelectrochemical Platforms for Biomarker Immunosensing

Kaili Niu, Yuzhen Li, Ruili Bai, Yongfang Qu and Yanyan Song <sup>\*a</sup>

Department of Chemistry, Northeastern University, Shenyang 110004, China, \*Email:  
[yysong@mail.neu.edu.cn](mailto:yysong@mail.neu.edu.cn)

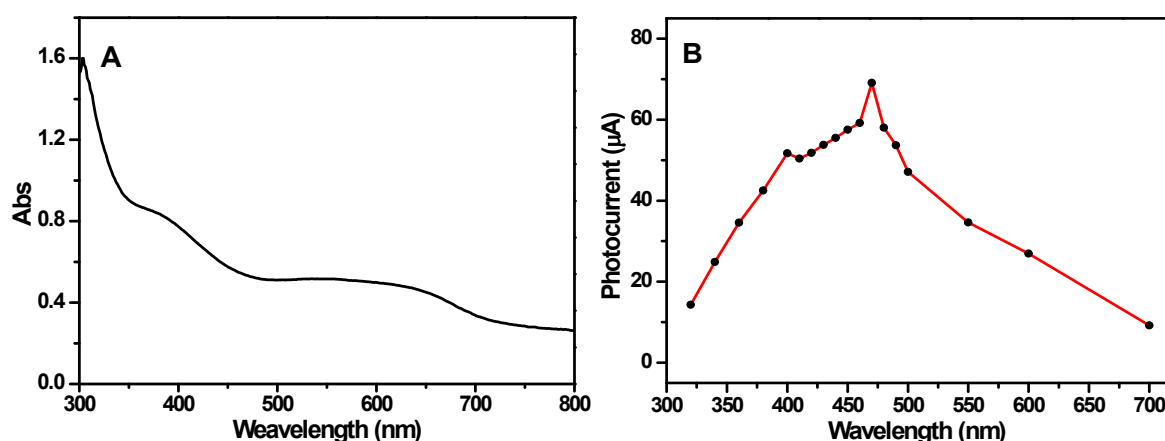

**Fig. S1** (A) UV-vis spectrum of the as-prepared CdSe/ITO sample. (B) Photocurrent responses of CdSe/ITO at various excitation wavelengths. The PEC tests were performed in 0.1 M PBS containing 0.1 M TEA with 0 V applied potential.

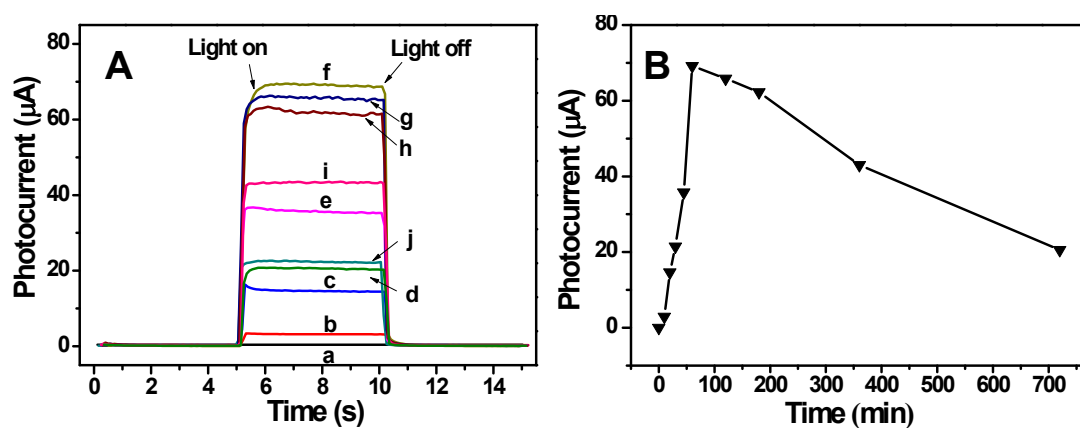

**Fig. S2** (A) Photocurrent responses of CdSe/ITO electrode at the same anion-exchange temperature (60 °C) and different exchange times of (a) 0 min, (b) 10 min, (c) 20 min, (d) 30 min, (e) 45 min, (f) 60 min, (g) 120 min, (h) 180 min, (i) 360 min, and (j) 720 min. (B) The corresponding photocurrent versus anion-exchange time curve. The PEC tests were performed in 0.1 M PBS containing 0.1 M TEA with 0 V applied potential and 470 nm excitation.

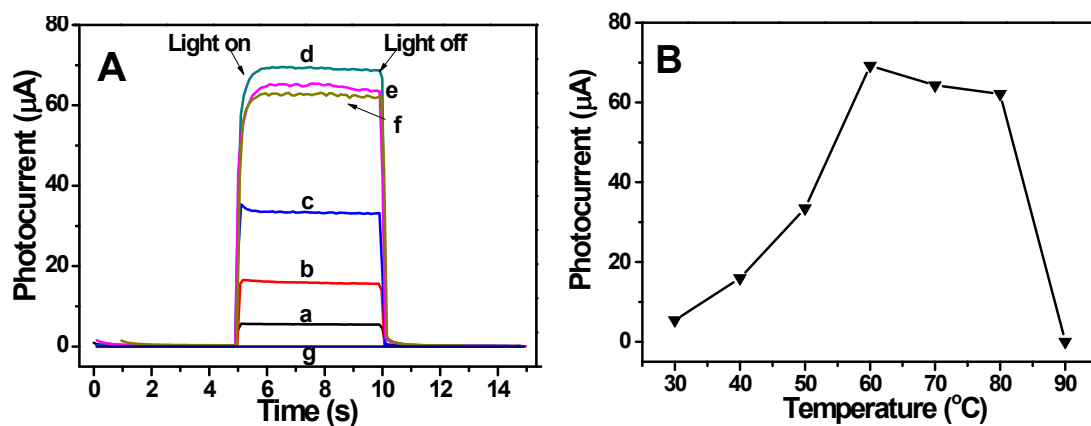

**Fig. S3** (A) Photocurrent responses of CdSe/ITO electrode at the same anion-exchange time (60 min) and different exchange temperatures of (a) 30  $^{\circ}\text{C}$ , (b) 40  $^{\circ}\text{C}$ , (c) 50  $^{\circ}\text{C}$ , (d) 60  $^{\circ}\text{C}$ , (e) 70  $^{\circ}\text{C}$ , (f) 80  $^{\circ}\text{C}$ , and (g) 90  $^{\circ}\text{C}$ . (B) The corresponding photocurrent versus exchange temperature curve. The PEC tests were performed in 0.1 M PBS containing 0.1 M TEA with 0 V applied potential and 470 nm excitation.

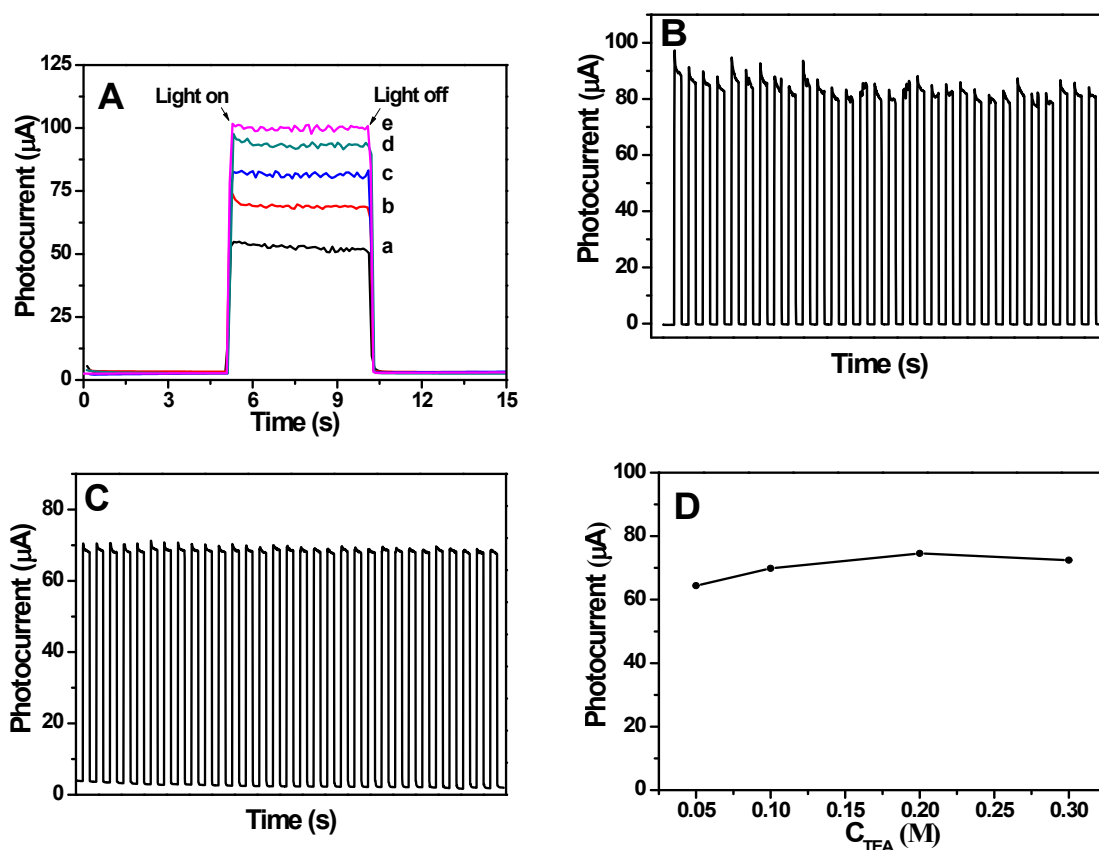

**Fig. S4** (A) Photocurrent responses of CdSe/ITO electrode in different solutions: (a) 0.1 M PBS (pH 7.4) only, (b) 0.1 M PBS containing 0.1 M TEA, (c) 0.1 M PBS containing 0.1 M AA, (d) 0.1 M PBS containing 0.1 M  $\text{Na}_2\text{SO}_3$ , and (e) 0.1 M PBS containing 0.1 M  $\text{Na}_2\text{S}$  and 0.1 M  $\text{Na}_2\text{SO}_3$ . (B) Time-based photocurrent responses of the prepared CdSe/ITO electrode in 0.1 M PBS containing 0.1 M AA. (C) Time-based photocurrent response of the prepared CdSe/ITO electrode in 0.1 M PBS containing 0.1 M TEA. (D) Photocurrent responses of 0.1 M PBS containing different concentrations of TEA. The PEC tests were performed with 0 V applied potential and 470 nm excitation wavelength.

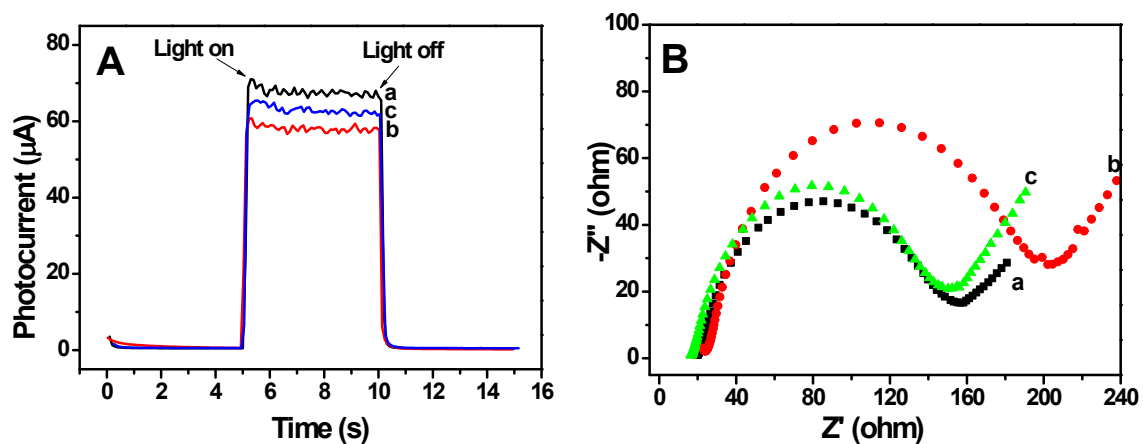

**Fig. S5** (A) Photocurrent responses of CdSe/ITO electrode (a) before and (b) after TDPA passivation, and (c) after immersion in PMA. The PEC tests were performed in 0.1 M PBS containing 0.1 M TEA with 0 V applied potential and 470 nm excitation. (B) EIS of CdSe/ITO electrode (a) before and (b) after TDPA passivation, and (c) after immersion in PMA.

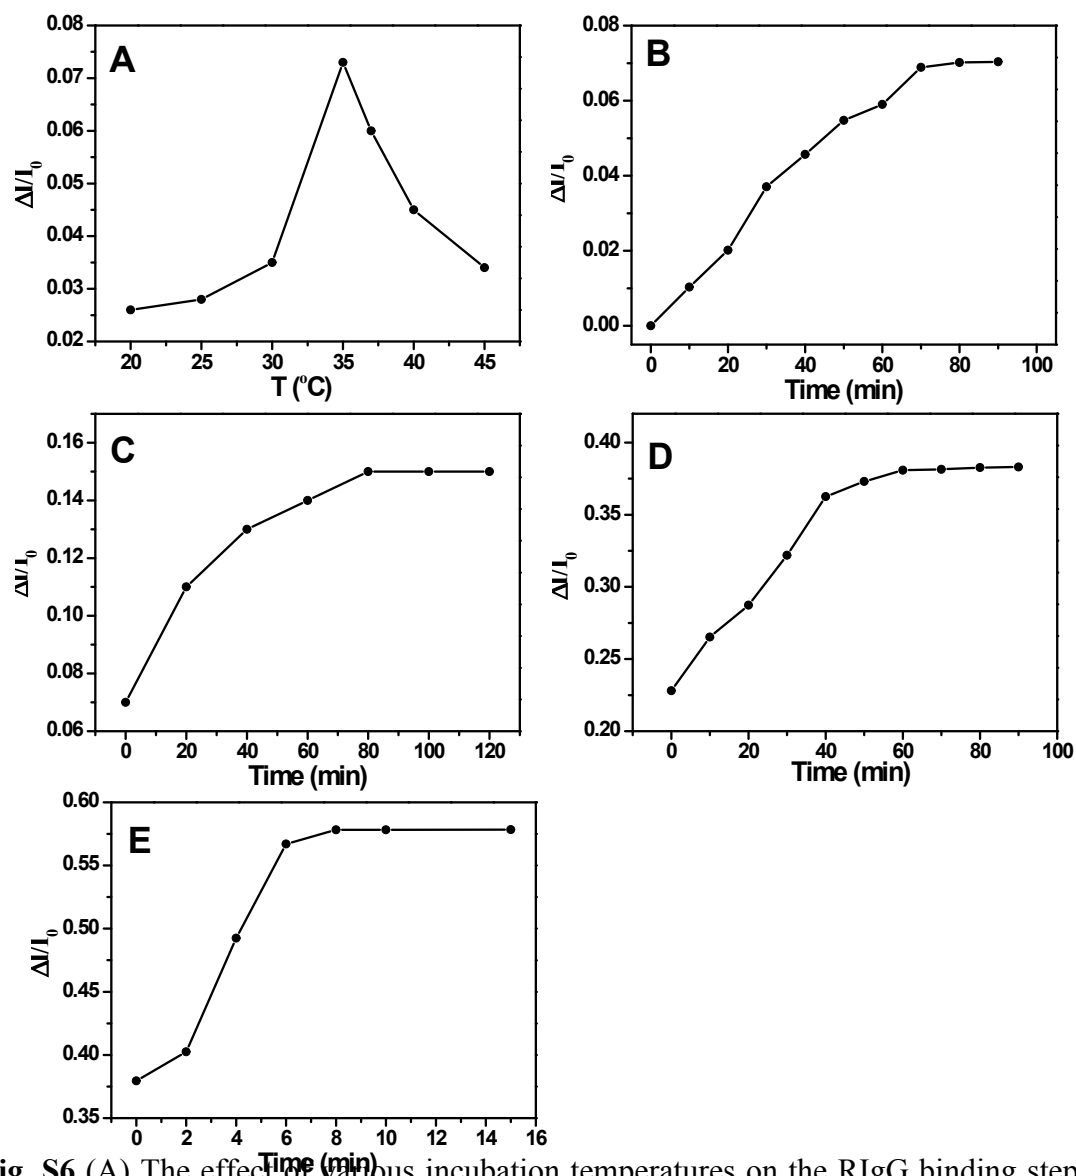

**Fig. S6** (A) The effect of various incubation temperatures on the RIgG binding step. The effect of various incubation times for (B) RIgG, (C) B-Ab<sub>2</sub>, (D) B-HRP, and (E) BCP.

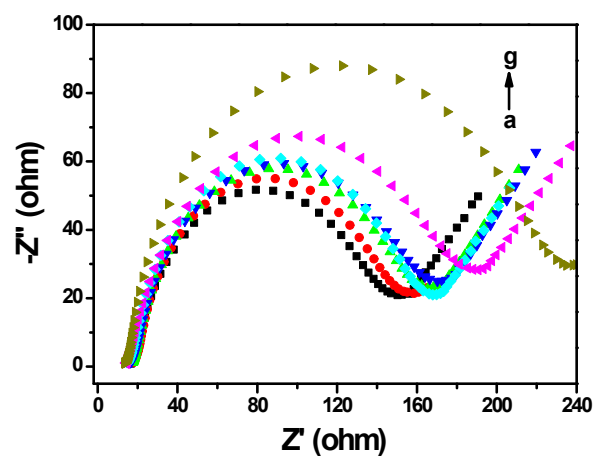

**Fig. S7** EIS of CdSe/ITO electrode (a) before and (b) after Ab<sub>1</sub> immobilization, (c) after further blocking with BSA, (d) after anchoring RIgG corresponding to 0.1 µg/mL, (e) after B-Ab<sub>2</sub> immobilization, (f) after labeling with avidin and B-HRP, and (g) after a final 8 min enzyme-catalyzed BCP.

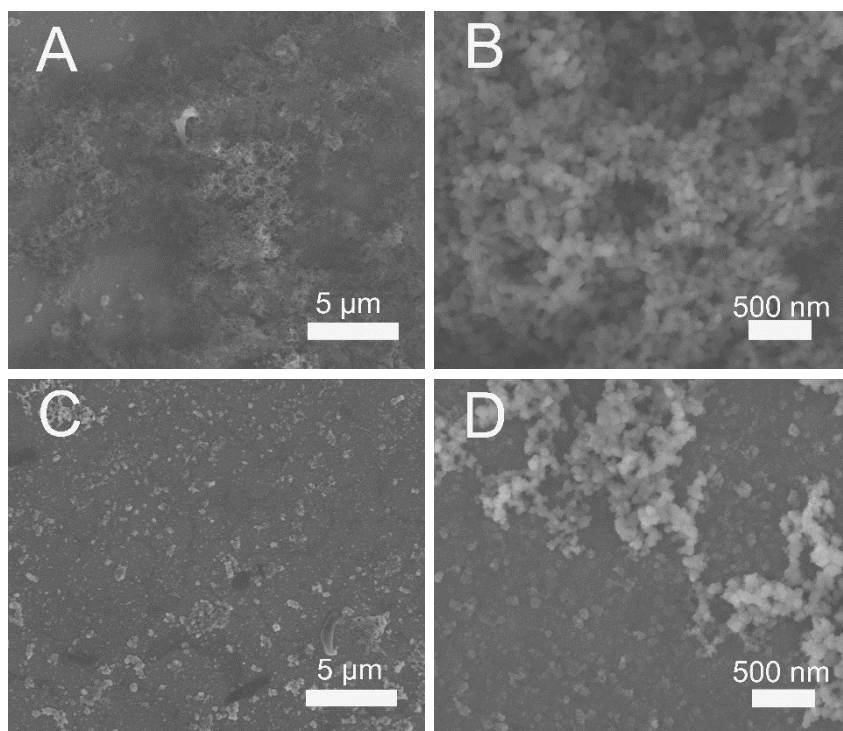

**Fig. S8** SEM images of (A,B) the amplified photoelectrochemical immunosensing after BCP and (C,D) the normal photoelectrochemical immunosensing after BCP.

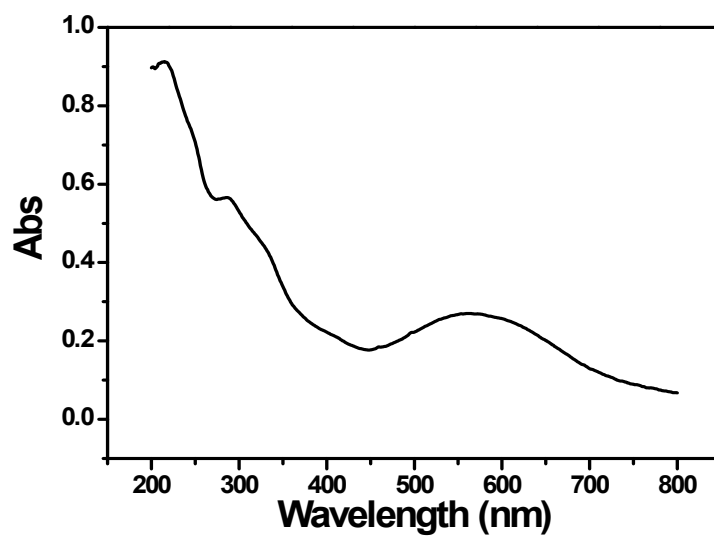



**Fig. S9** UV-vis spectrum of benzo-4-chlorohexadienone from BCP.

Table S1. Recoveries of RIgG in rabbit serum samples using the CdSe/ITO PEC platform.

| Sample       | RIgG( $\times 10^{-8}$ ) |                                                  |                      |          |
|--------------|--------------------------|--------------------------------------------------|----------------------|----------|
|              | added                    | Found (mean <sup>a</sup> $\pm$ SD <sup>b</sup> ) | RSD <sup>c</sup> (%) | Recovery |
| Rabbit Serum | 0                        | 2.347 $\pm$ 0.031                                | 1.32                 | —        |
|              | 1                        | 3.253 $\pm$ 0.059                                | 1.81                 | 90.60%   |
|              | 5                        | 7.433 $\pm$ 0.064                                | 0.86                 | 101.72%  |
|              | 10                       | 12.193 $\pm$ 0.061                               | 0.50                 | 98.46%   |

<sup>a</sup> Mean of three measurements

<sup>b</sup> Standard deviation

<sup>c</sup> Relative standard deviation
